# Supplementary material for: A SINE Insertion in ATP1B2 in Belgian Shepherd Dogs Affected by Spongy Degeneration with Cerebellar Ataxia (SDCA2)
Source: PubMed Central journal article supplement (PMC5555477; doi:10.1534/g3.117.043018), 2017-06-15
Supplement: 2729TableS1.pdf [file 2729TableS1.pdf]

**Table S1. Inherited cerebellar ataxias in the dog with known genetic basis described to date**

| Gene Symbol   | Gene Full Name                                                             | Protein Function                                                                                                                                                                                      | Affected Dog breed(s)                        | Phenotype name in Dog(s)                                                                             | OMIA        | Phenotype name in Human                                                                                                                       | Common Feature 1                                    | Common Feature 2   |
|---------------|----------------------------------------------------------------------------|-------------------------------------------------------------------------------------------------------------------------------------------------------------------------------------------------------|----------------------------------------------|------------------------------------------------------------------------------------------------------|-------------|-----------------------------------------------------------------------------------------------------------------------------------------------|-----------------------------------------------------|--------------------|
| <i>ATG4D</i>  | Autophagy related 4D cysteine peptidase                                    | Component of the autophagy-lysosome pathway                                                                                                                                                           | Lagotto Romagnolo                            | Neurodegenerative vacuolar storage disease (Kyöstilä <i>et al.</i> 2015)                             | 001954-9615 | -                                                                                                                                             | Protein degradation pathway                         |                    |
| <i>RAB24</i>  | RAB24, member RAS oncogene family                                          | Described as necessary for autophagy, which allows global turnover of cellular organelles as well as clearance of potentially toxic long-lived proteins and allows intracellular neuronal homeostasis | Old English Sheepdogs & Gordon Setters       | Canine hereditary ataxia (Agler <i>et al.</i> 2014)                                                  | 001913-9615 | -                                                                                                                                             |                                                     |                    |
| <i>SEL1L</i>  | SEL1L ERAD E3 ligase adaptor subunit                                       | Component of the endoplasmic reticulum associated protein degradation machinery that targets misfolded proteins to the ubiquitin proteasome system for degradation                                    | Finnish Hound                                | Canine progressive early-onset cerebellar ataxia (Kyöstilä <i>et al.</i> 2012)                       | 001692-9615 | -                                                                                                                                             |                                                     |                    |
| <i>SNX14</i>  | Sorting nexin 14                                                           | Essential role in neural development and function, particularly in the autophagy degradation pathway                                                                                                  | Hungarian Vizsla                             | Cerebellar cortical degeneration (Fenn <i>et al.</i> 2016)                                           | 002034-9615 | SCAR20 (MIM#616354) (Thomas <i>et al.</i> 2014; Shukla <i>et al.</i> 2017)                                                                    |                                                     |                    |
| <i>CAPN1</i>  | Calpain 1                                                                  | The exact role of this protease in humans is not clear to date. It has been suggested to be important for synaptic plasticity and development of the CNS                                              | Parson Russell Terrier                       | Spinocerebellar Ataxia (Forman <i>et al.</i> 2013)                                                   | 001820-9615 | SPG76 (MIM#616907) (Gan-Or <i>et al.</i> 2016; Wang <i>et al.</i> 2016)                                                                       | Possible involvement in protein degradation pathway | Neural development |
| <i>SPTBN2</i> | Spectrin beta, non-erythrocytic 2 ( $\beta$ -III spectrin)                 | Critical for Purkinje cells development. Stabilize the glutamate transporter EAAT4 of Purkinje cells, facilitate protein trafficking, maintain high density of sodium channels                        | Beagle                                       | Neonatal cerebellar cortical degeneration (Forman <i>et al.</i> 2012)                                | 002092-9615 | SCA5 (MIM#600224) & SCAR14 (MIM#615386) (Jackson <i>et al.</i> 2001; Ikeda <i>et al.</i> 2006; Elsayed <i>et al.</i> 2014)                    |                                                     |                    |
| <i>VLDLR</i>  | Very low density lipoprotein receptor                                      | Essential in regulating the correct cortical and cerebellar neuronal migration during embryonic development                                                                                           | Eurasier                                     | Dandy-Walker-like malformation (M. Gerber <i>et al.</i> 2015)                                        | 001947-9615 | CAMRQ1 (MIM# 224050) (Boycott <i>et al.</i> 2005; Micalizzi <i>et al.</i> 2016)                                                               |                                                     |                    |
| <i>GRM1</i>   | Glutamate metabotropic receptor 1 (mGluR1)                                 | Essential role in cerebellar development and synaptic plasticity by modulating intracellular $Ca^{2+}$ levels and neuronal excitability                                                               | Coton de Tulear                              | Bandera's neonatal ataxia (Zeng <i>et al.</i> 2011)                                                  | 000078-9615 | SCAR13 (MIM#614831) (Guergueltcheva <i>et al.</i> 2012)                                                                                       |                                                     |                    |
| <i>ITPR1</i>  | Inositol 1,4,5-trisphosphate receptor type 1 (IP <sub>3</sub> R1)          | Central role in the regulation of intracellular $Ca^{2+}$ concentration. Involvement of $Ca^{2+}$ in developmental events and gene expression has been suggested                                      | Italian Spinone                              | Spinocerebellar ataxia (Forman <i>et al.</i> 2015)                                                   | 002097-9615 | SCA15 (MIM#606658) & SCA29 (MIM#117360) & GLSP (MIM#206700) (Huang <i>et al.</i> 2012; Tada <i>et al.</i> 2016; S. Gerber <i>et al.</i> 2016) | Ion channel                                         |                    |
| <i>KCNJ10</i> | Potassium voltage-gated channel subfamily J member 10 (K <sub>v</sub> 4.1) | Key role in modulating the resting membrane potential of neuronal cells through potassium spatial buffering                                                                                           | Belgian Shepherd<br>Several Russell Terriers | SDCA1 (Mauri <i>et al.</i> 2017; Van Poucke <i>et al.</i> 2017)<br>SAMS (Gilliam <i>et al.</i> 2014) | 002089-9615 | EAST Syndrome (MIM#612780) (Bockenbauer <i>et al.</i> 2009; Abdelhadi <i>et al.</i> 2016)                                                     |                                                     |                    |

**Abbreviations:** SCAR: autosomal recessive spinocerebellar ataxia; CNS: central nervous system; CAMRQ1: autosomal recessive cerebellar hypoplasia and mental retardation with or without quadrupedal locomotion 1; SPG76: autosomal recessive spastic paraplegia 76; GLSP: Gillespie Syndrome; SDCA1: spongy degeneration with cerebellar ataxia 1; SAMS: spinocerebellar ataxia with myokymia, seizures, or both; EAST: epilepsy, ataxia, sensorineural deafness, and renal salt wasting tubulopathy.

## LITERATURE CITED (in Table S1)

- Abdelhadi, O., D. Iancu, H. Stanescu, R. Kleta, and D. Bockenhauer, 2016 EAST Syndrome: Clinical, Pathophysiological, and Genetic Aspects of Mutations in KCNJ10. *Rare Dis.* 4: e1195043.
- Agler, C., D. M. Nielsen, G. Urkasemsin, A. Singleton, N. Tonomura *et al.*, 2014 Canine Hereditary Ataxia in Old English Sheepdogs and Gordon Setters Is Associated with a Defect in the Autophagy Gene Encoding RAB24. *PLoS Genet.* 10: e1003991.
- Bockenhauer, D., S. Feather, H. C. Stanescu, S. Bandulik, A. A. Zdebik *et al.*, 2009 Epilepsy, Ataxia, Sensorineural Deafness, Tubulopathy, and KCNJ10 Mutations. *N. Engl. J. Med.* 360: 1960–1970.
- Boycott, K. M., S. Flavelle, A. Bureau, H. C. Glass, T. M. Fujiwara *et al.*, 2005 Homozygous Deletion of the Very Low Density Lipoprotein Receptor Gene Causes Autosomal Recessive Cerebellar Hypoplasia with Cerebral Gyral Simplification. *Am. J. Hum. Genet.* 77: 477–483.
- Elsayed, S. M., R. Heller, M. Thoenes, M. S. Zaki, D. Swan *et al.*, 2014 Autosomal Dominant SCA5 and Autosomal Recessive Infantile SCA Are Allelic Conditions Resulting from SPTBN2 Mutations. *Eur. J. Hum. Genet.* 22: 286–288.
- Fenn, J., M. Bournsnell, R. J. Hitti, C. A. Jenkins, R. L. Terry *et al.*, 2016 Genome Sequencing Reveals a Splice Donor Site Mutation in the SNX14 Gene Associated with a Novel Cerebellar Cortical Degeneration in the Hungarian Vizsla Dog Breed. *BMC Genet.* 17: 123.
- Forman, O. P., L. De Risio, K. Matiasek, S. Platt, and C. Mellersh, 2015 Spinocerebellar Ataxia in the Italian Spinone Dog Is Associated with an Intronic GAA Repeat Expansion in ITPR1. *Mamm. Genome* 26: 108–117.
- Forman, O. P., L. De Risio, and C. S. Mellersh, 2013 Missense Mutation in CAPN1 Is Associated with Spinocerebellar Ataxia in the Parson Russell Terrier Dog Breed. *PLoS One* 8: e64627.
- Forman, O. P., L. De Risio, J. Stewart, C. S. Mellersh, and E. Beltran, 2012 Genome-Wide mRNA Sequencing of a Single Canine Cerebellar Cortical Degeneration Case Leads to the Identification of a Disease Associated SPTBN2 Mutation. *BMC Genet.* 13: 55.
- Gan-Or, Z., N. Bouslam, N. Birouk, A. Lissouba, D. B. Chambers *et al.*, 2016 Mutations in CAPN1 Cause Autosomal-Recessive Hereditary Spastic Paraplegia. *Am. J. Hum. Genet.* 98: 1038–1046.
- Gerber, M., A. Fischer, V. Jagannathan, M. Drögemüller, C. Drögemüller *et al.*, 2015 A Deletion in the VLDLR Gene in Eurasier Dogs with Cerebellar Hypoplasia Resembling a Dandy-Walker-like Malformation (DWLM). *PLoS One* 10: e0108917.
- Gerber, S., K. J. Alzayady, L. Burglen, D. Brémond-Gignac, V. Marchesin *et al.*, 2016 Recessive and Dominant De Novo ITPR1 Mutations Cause Gillespie Syndrome. *Am. J. Hum. Genet.* 98: 971–980.
- Gilliam, D., D.P. O'Brien, J.R. Coates, G.S. Johnson, G.C. Johnson *et al.*, 2014 A Homozygous KCNJ10 Mutation in Jack Russell Terriers and Related Breeds with Spinocerebellar Ataxia with Myokymia, Seizures, or Both. *J. Vet. Inter. Med.* 28: 871–877.
- Guerguelcheva, V., D. N. Azmanov, D. Angelicheva, K. R. Smith, T. Chamova *et al.*, 2012 Autosomal-Recessive Congenital Cerebellar Ataxia Is Caused by Mutations in Metabotropic Glutamate Receptor 1. *Am. J. Hum. Genet.* 91: 553–564.
- Huang, L., J. Warman Chardon, M. T. Carter, K. L. Friend, T. E. Dudding *et al.*, 2012 Missense Mutations in ITPR1 Cause Autosomal Dominant Congenital Nonprogressive Spinocerebellar Ataxia. *Orphanet J. Rare Dis.* 7: 67.
- Ikeda, Y., K. A. Dick, M. R. Weatherspoon, D. Gincel, K. R. Armbrust *et al.*, 2006 Spectrin Mutations Cause Spinocerebellar Ataxia Type 5. *Nat. Genet.* 38: 184–190.
- Jackson, M., W. Song, M. Y. Liu, L. Jin, M. Dykes-Hoberg *et al.*, 2001 Modulation of the Neuronal Glutamate Transporter EAAT4 by Two Interacting Proteins. *Nature* 410: 89–93.
- Kyöstilä, K., S. Cizinauskas, E. H. Seppälä, E. Suhonen, J. Jeserevics *et al.*, 2012 A SEL1L Mutation Links a Canine Progressive Early-Onset Cerebellar Ataxia to the Endoplasmic Reticulum-Associated Protein Degradation (ERAD) Machinery. *PLoS Genet.* 8: e1002759.
- Kyöstilä, K., P. Syrjä, V. Jagannathan, G. Chandrasekar, T. S. Jokinen *et al.*, 2015 A Missense Change in the ATG4D Gene Links Aberrant Autophagy to a Neurodegenerative Vacuolar Storage Disease. *PLoS Genet.* 11: e1005169.

- Mauri, N., M. Kleiter, M. Leschnik, S. Högler, E. Dietschi *et al.*, 2017 A Missense Variant in KCNJ10 in Belgian Shepherd Dogs Affected by Spongy Degeneration with Cerebellar Ataxia (SDCA1). *G3 (Bethesda)* 7: 663–669.
- Micalizzi, A., I. Moroni, M. Ginevrino, T. Biagini, T. Mazza *et al.*, 2016 Very Mild Features of Dysequilibrium Syndrome Associated with a Novel VLDLR Missense Mutation. *Neurogenetics* 17: 191–195.
- Shukla, A., P. Upadhyai, J. Shah, K. Neethukrishna, S. Bielas *et al.*, 2017 Autosomal Recessive Spinocerebellar Ataxia 20: Report of a New Patient and Review of Literature. *Eur. J. Med. Genet.* 60: 118–123.
- Tada, M., M. Nishizawa, and O. Onodera, 2016 Roles of Inositol 1,4,5-Trisphosphate Receptors in Spinocerebellar Ataxias. *Neurochem. Int.* 94: 1–8.
- Thomas, A. C., H. Williams, N. Setó-Salvia, C. Bacchelli, D. Jenkins *et al.*, 2014 Mutations in SNX14 Cause a Distinctive Autosomal-Recessive Cerebellar Ataxia and Intellectual Disability Syndrome. *Am. J. Hum. Genet.* 95: 611–621.
- Van Poucke, M., K. Stee, S. F. M. Bhatti, A. Vanhaesebrouck, L. Bosseler *et al.*, 2017 The Novel Homozygous KCNJ10 c.986T>C (p.(Leu329Pro)) Variant Is Pathogenic for the SeSAME/EAST Homologue in Malinois Dogs. *Eur. J. Hum. Genet.* 25: 222–226.
- Wang, Y., J. Hershenson, D. Lopez, M. Hammer, Y. Liu *et al.*, 2016 Defects in the CAPN1 Gene Result in Alterations in Cerebellar Development and Cerebellar Ataxia in Mice and Humans. *Cell Rep.* 16: 79–91.
- Zeng, R., F. H. G. Farias, G. S. Johnson, S. D. McKay, R. D. Schnabel *et al.*, 2011 A Truncated Retrotransposon Disrupts the GRM1 Coding Sequence in Coton de Tulear Dogs with Bandera's Neonatal Ataxia. *J. Vet. Inter. Med.* 25: 267–272.
