# Supplementary material for: A SINE Insertion in ATP1B2 in Belgian Shepherd Dogs Affected by Spongy Degeneration with Cerebellar Ataxia (SDCA2)
Source: G3 (Bethesda). 2017 Jun 15;7(8):2729–37. doi: 10.1534/g3.117.043018 (PMC5555477; doi:10.1534/g3.117.043018)
Supplement: Supplementary file 2 [file 2729FileS2.pdf]

**File S2. Sequence context of the 227 bp SINE insertion into exon 2 of the canine *ATP1B2* gene**

|                  |                                                |                       |
|------------------|------------------------------------------------|-----------------------|
| Genetic variant: | Chr5:32,551,064_32,551,065ins227               | (CanFam 3.1 assembly) |
|                  | <i>ATP1B2</i> :c.130_131ins227                 | (XM_546597.5)         |
|                  | <i>ATP1B2</i> :c.130_131insLT796559.1:g.50_276 | (XM_546597.5)         |

CanFam 3.1, chromosome 5 genomic sequence, positions 32,550,985 - 32,551,224 (NC\_006587.3)

Wildtype *ATP1B2* exon 2, 129 nucleotides in black CAPITAL LETTERS (129 nt)

227 bp SINE-insertion in blue

PCR primers for the amplification of a genomic 198 bp product (wildtype allele) vs. a genomic 425 bp product (variant allele) are indicated in green and beneath the sequence with “>>>” and “<<<”.

[illegible]
